# Supplementary material for: Pharmacological and molecular dynamics analyses of differences in inhibitor binding to human and nematode PDE4: Implications for management of parasitic nematodes
Source: PLOS journal article supplement (doi:10.1371/journal.pone.0214554), 2019-03-27

**S9 Figure. Dynamic cross correlation matrices calculated for the C<sub>α</sub> atoms of human PDE4D and *C. elegans* PDE4 in their apo state.** Color scheme is the same as for Fig. S8. Panels a-c represent three independent simulations.

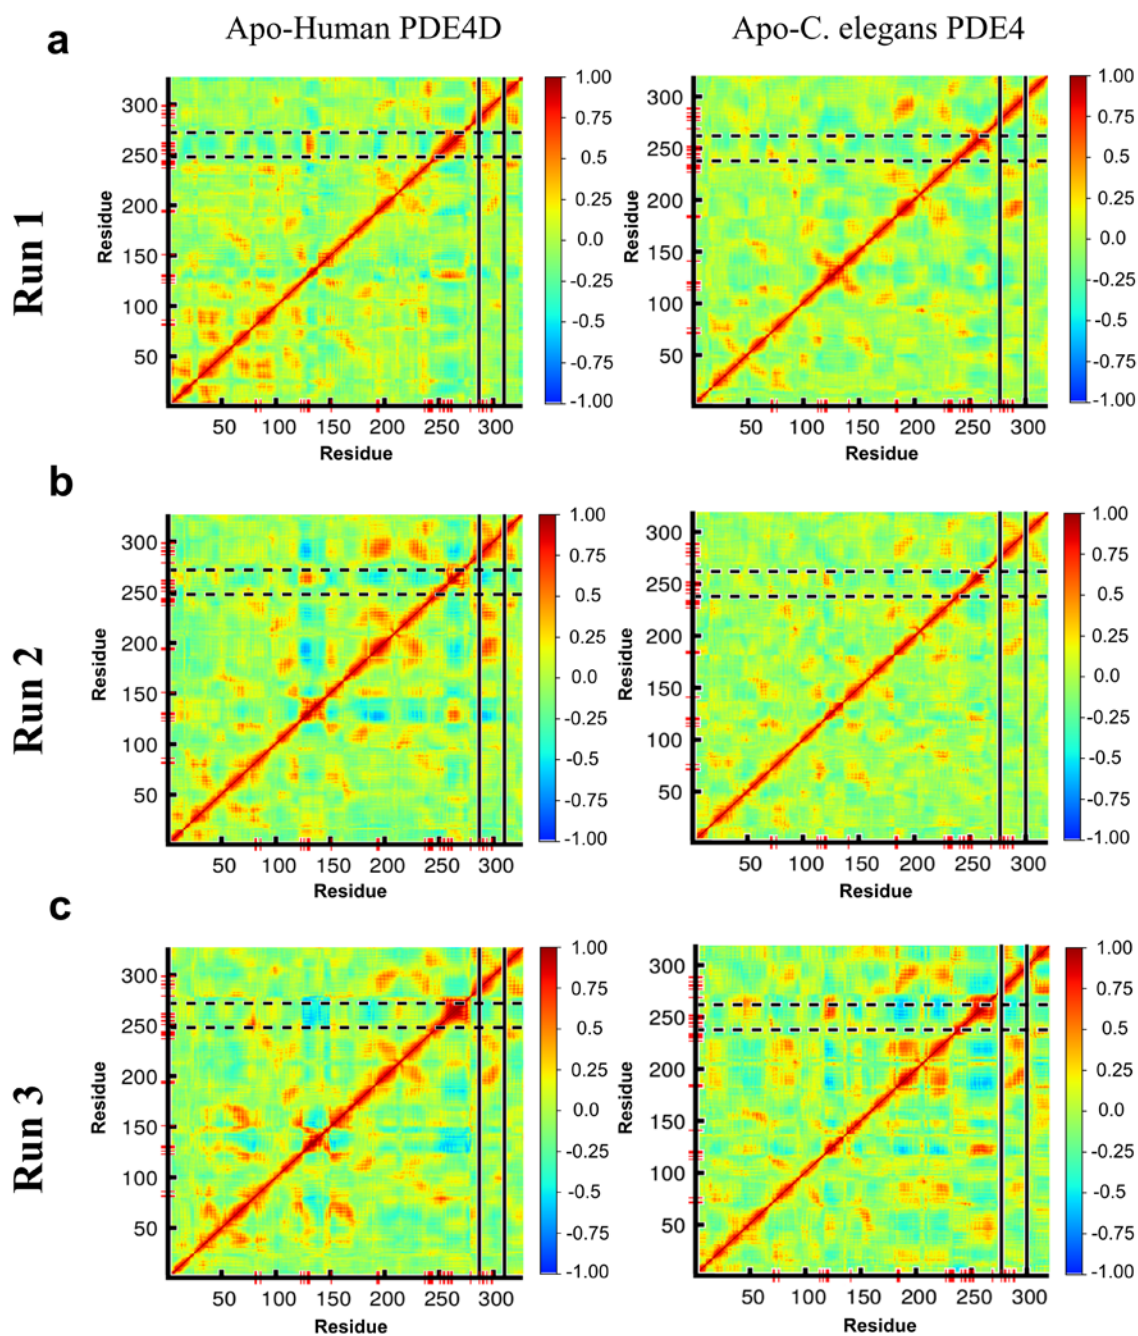

Supplement: S13 (10.1371/journal.pone.0214554.s013) [file journal.pone.0214554.s013]
